# Supplementary material for: Cryo-plasma FIB/SEM volume imaging of biological specimens
Source: eLife. 2023 Feb 21;12:e83623. doi: 10.7554/eLife.83623 (PMC9995114; doi:10.7554/eLife.83623)
Supplement: Figure 1—figure supplement 5—source data 1. [file elife-83623-fig1-figsupp5-data1.xlsx]

## Sheet: Sheet1
30 kV				20 kV
Gas	Beam current (pA)	mean FWHM (nm)	SD (nm)	Gas	Beam current (pA)	mean FWHM (nm)	SD (nm)
Argon	10300	876.2	81.6	Argon	8660	1281.4	23.8
	2600	598.7	18.3		2760	992.3	7.8
	199	288.5	8.3		156	320.6	17
Xenon	3680	992.6	31.8	Xenon	2790	921.8	13.8
	958	524.3	21.3		920	745.9	12.9
	84	342	3.7		79	390.4	39.2
Oxygen	8870	1475.3	44.4	Oxygen	6640	1443.8	41.1
	2330	914.5	39.4		2030	877.8	41.1
	303	471	6.2		334	540.9	15.9
Nitrogen	30720	2417.2	277.6	Nitrogen	12890	2934.1	60.8
	3660	978.2	29.2		2850	1064.9	45
	345	415.7	50.8		398	527	44.6
