# Supplementary material for: Cryo-plasma FIB/SEM volume imaging of biological specimens
Source: eLife. 2023 Feb 21;12:e83623. doi: 10.7554/eLife.83623 (PMC9995114; doi:10.7554/eLife.83623)
Supplement: Figure 6—source data 1. [file elife-83623-fig6-data1.xlsx]

## Sheet: Sheet1
mitoID	Volume				Volume
2	0.2			FOV	542.562
7	0.38			LD	2.49597
12	0.096			mito	3.26269
14	0.07			ER	5.19662
16	0.024
17	0.033
