# Supplementary material for: Cryo-plasma FIB/SEM volume imaging of biological specimens
Source: eLife. 2023 Feb 21;12:e83623. doi: 10.7554/eLife.83623 (PMC9995114; doi:10.7554/eLife.83623)
Supplement: Figure 8—source data 1. [file elife-83623-fig8-data1.xlsx]

## Sheet: Sheet1
sample	milling gas	software	SEM imaging angle (deg)	pixel size (nm)	length slice serie	resolution start (nm)	resolution mid (nm)	resolution end (nm)	additional mask
R. Rubrum	argon (20kV)	Serial FIB	90	1.942	26	20 ± 5.5	20 ± 6.6	20 ± 7.1	no
HeLa	argon (20kV)	TFS ASV	52	6.745	500	62 ± 25	60 ± 45	63 ± 29.7	no
Vero	nitrogen (30kV)	Serial FIB	90	1.927	46	10 ± 10.4	11 ± 2.8	11 ± 6.2	no
brain	argon (20kV)	TFS ASV	52	6.745	59	39 ± 16.2	38 ± 9.2	38 ± 7.4	no
heart	argon (30kV)	TFS ASV	90	5.62	136	52 ± 11.3	59 ± 12.7	57 ± 12.2	no
